# Supplementary material for: Multisystem Inflammatory Syndrome Temporally Related to COVID-19 in Children From Latin America and the Caribbean Region: A Systematic Review With a Meta-Analysis of Data From Regional Surveillance Systems
Source: PubMed Central journal article supplement (PMC9082071; doi:10.3389/fped.2022.881765), 2022-04-25
Supplement: Data_Sheet_1.pdf [file Data_Sheet_1.pdf]

## Supplemental Material

Table A1

| Section and Topic       | Item # | Checklist item                                                                                                                                                                                                                                                                   | Location where item is reported (page) |
|-------------------------|--------|----------------------------------------------------------------------------------------------------------------------------------------------------------------------------------------------------------------------------------------------------------------------------------|----------------------------------------|
| <b>TITLE</b>            |        |                                                                                                                                                                                                                                                                                  |                                        |
| Title                   | 1      | Identify the report as a systematic review.                                                                                                                                                                                                                                      | 1                                      |
| <b>ABSTRACT</b>         |        |                                                                                                                                                                                                                                                                                  |                                        |
| Abstract                | 2      | See the PRISMA 2020 for Abstracts checklist.                                                                                                                                                                                                                                     | 4                                      |
| <b>INTRODUCTION</b>     |        |                                                                                                                                                                                                                                                                                  |                                        |
| Rationale               | 3      | Describe the rationale for the review in the context of existing knowledge.                                                                                                                                                                                                      | 4                                      |
| Objectives              | 4      | Provide an explicit statement of the objective(s) or question(s) the review addresses.                                                                                                                                                                                           | 4                                      |
| <b>METHODS</b>          |        |                                                                                                                                                                                                                                                                                  |                                        |
| Eligibility criteria    | 5      | Specify the inclusion and exclusion criteria for the review and how studies were grouped for the syntheses.                                                                                                                                                                      | 4                                      |
| Information sources     | 6      | Specify all databases, registers, websites, organisations, reference lists and other sources searched or consulted to identify studies. Specify the date when each source was last searched or consulted.                                                                        | 4                                      |
| Search strategy         | 7      | Present the full search strategies for all databases, registers and websites, including any filters and limits used.                                                                                                                                                             | 4                                      |
| Selection process       | 8      | Specify the methods used to decide whether a study met the inclusion criteria of the review, including how many reviewers screened each record and each report retrieved, whether they worked independently, and if applicable, details of automation tools used in the process. | 4- 5 (fig 1)                           |
| Data collection process | 9      | Specify the methods used to collect data from reports, including how many reviewers collected data from each report, whether they worked independently, any processes for obtaining or confirming data from                                                                      | 5- 6                                   |

|                               |     |                                                                                                                                                                                                                                                                               |      |
|-------------------------------|-----|-------------------------------------------------------------------------------------------------------------------------------------------------------------------------------------------------------------------------------------------------------------------------------|------|
|                               |     | study investigators, and if applicable, details of automation tools used in the process.                                                                                                                                                                                      |      |
| Data items                    | 10a | List and define all outcomes for which data were sought. Specify whether all results that were compatible with each outcome domain in each study were sought (e.g. for all measures, time points, analyses), and if not, the methods used to decide which results to collect. | 4- 5 |
|                               | 10b | List and define all other variables for which data were sought (e.g. participant and intervention characteristics, funding sources). Describe any assumptions made about any missing or unclear information.                                                                  | NO   |
| Study risk of bias assessment | 11  | Specify the methods used to assess risk of bias in the included studies, including details of the tool(s) used, how many reviewers assessed each study and whether they worked independently, and if applicable, details of automation tools used in the process.             | 5    |
| Effect measures               | 12  | Specify for each outcome the effect measure(s) (e.g. risk ratio, mean difference) used in the synthesis or presentation of results.                                                                                                                                           | 5    |
| Synthesis methods             | 13a | Describe the processes used to decide which studies were eligible for each synthesis (e.g. tabulating the study intervention characteristics and comparing against the planned groups for each synthesis (item #5)).                                                          | 4    |
|                               | 13b | Describe any methods required to prepare the data for presentation or synthesis, such as handling of missing summary statistics, or data conversions.                                                                                                                         | NO   |
|                               | 13c | Describe any methods used to tabulate or visually display results of individual studies and syntheses.                                                                                                                                                                        | 4    |
|                               | 13d | Describe any methods used to synthesize results and provide a rationale for the choice(s). If meta-analysis was performed, describe the model(s), method(s) to identify the presence and extent of statistical heterogeneity, and software package(s) used.                   | 12   |
|                               | 13e | Describe any methods used to explore possible causes of heterogeneity among study results (e.g. subgroup analysis, meta-regression).                                                                                                                                          | 4    |
|                               | 13f | Describe any sensitivity analyses conducted to assess robustness of the synthesized results.                                                                                                                                                                                  | NO   |

|                               |     |                                                                                                                                                                                                                                                                                      |                   |
|-------------------------------|-----|--------------------------------------------------------------------------------------------------------------------------------------------------------------------------------------------------------------------------------------------------------------------------------------|-------------------|
| Reporting bias assessment     | 14  | Describe any methods used to assess risk of bias due to missing results in a synthesis (arising from reporting biases).                                                                                                                                                              | 12                |
| Certainty assessment          | 15  | Describe any methods used to assess certainty (or confidence) in the body of evidence for an outcome.                                                                                                                                                                                | NO                |
| <b>RESULTS</b>                |     |                                                                                                                                                                                                                                                                                      |                   |
| Study selection               | 16a | Describe the results of the search and selection process, from the number of records identified in the search to the number of studies included in the review, ideally using a flow diagram.                                                                                         | Figure 1          |
|                               | 16b | Cite studies that might appear to meet the inclusion criteria, but which were excluded, and explain why they were excluded.                                                                                                                                                          | Table A6, page 47 |
| Study characteristics         | 17  | Cite each included study and present its characteristics.                                                                                                                                                                                                                            | Table 1           |
| Risk of bias in studies       | 18  | Present assessments of risk of bias for each included study.                                                                                                                                                                                                                         | 12                |
| Results of individual studies | 19  | For all outcomes, present, for each study: (a) summary statistics for each group (where appropriate) and (b) an effect estimate and its precision (e.g. confidence/credible interval), ideally using structured tables or plots.                                                     | Table 2- 6        |
| Results of syntheses          | 20a | For each synthesis, briefly summarize the characteristics and risk of bias among contributing studies.                                                                                                                                                                               | NO                |
|                               | 20b | Present results of all statistical syntheses conducted. If meta-analysis was done, present for each the summary estimate and its precision (e.g. confidence/credible interval) and measures of statistical heterogeneity. If comparing groups, describe the direction of the effect. | Table 2-4, plots  |
|                               | 20c | Present results of all investigations of possible causes of heterogeneity among study results.                                                                                                                                                                                       | Plots             |
|                               | 20d | Present results of all sensitivity analyses conducted to assess the robustness of the synthesized results.                                                                                                                                                                           | NO                |
| Reporting biases              | 21  | Present assessments of risk of bias due to missing results (arising from reporting biases) for each synthesis assessed.                                                                                                                                                              |                   |

|                                                |     |                                                                                                                                                                                                                                            |    |
|------------------------------------------------|-----|--------------------------------------------------------------------------------------------------------------------------------------------------------------------------------------------------------------------------------------------|----|
| Certainty of evidence                          | 22  | Present assessments of certainty (or confidence) in the body of evidence for each outcome assessed.                                                                                                                                        | NO |
| <b>DISCUSSION</b>                              |     |                                                                                                                                                                                                                                            |    |
| Discussion                                     | 23a | Provide a general interpretation of the results in the context of other evidence.                                                                                                                                                          | 27 |
|                                                | 23b | Discuss any limitations of the evidence included in the review.                                                                                                                                                                            | 26 |
|                                                | 23c | Discuss any limitations of the review processes used.                                                                                                                                                                                      | 22 |
|                                                | 23d | Discuss implications of the results for practice, policy, and future research.                                                                                                                                                             | 27 |
| <b>OTHER INFORMATION</b>                       |     |                                                                                                                                                                                                                                            |    |
| Registration and protocol                      | 24a | Provide registration information for the review, including register name and registration number, or state that the review was not registered.                                                                                             | 2  |
|                                                | 24b | Indicate where the review protocol can be accessed, or state that a protocol was not prepared.                                                                                                                                             | NO |
|                                                | 24c | Describe and explain any amendments to information provided at registration or in the protocol.                                                                                                                                            | NO |
| Support                                        | 25  | Describe sources of financial or non-financial support for the review, and the role of the funders or sponsors in the review.                                                                                                              | 24 |
| Competing interests                            | 26  | Declare any competing interests of review authors.                                                                                                                                                                                         | 24 |
| Availability of data, code and other materials | 27  | Report which of the following are publicly available and where they can be found: template data collection forms; data extracted from included studies; data used for all analyses; analytic code; any other materials used in the review. | NO |

*From:* Page MJ, McKenzie JE, Bossuyt PM, Boutron I, Hoffmann TC, Mulrow CD, et al. The PRISMA 2020 statement: an updated guideline for reporting systematic reviews. *BMJ* 2021;372:n71. doi: 10.1136/bmj.n71

For more information, visit: <http://www.prisma-statement.org/>

Table A2: risk of bias of cohort and cross-sectional studies

| Study ID                                 | Study design  | 1   | 2   | 3  | 4   | 5   | 6   | 7   | 8   | 9   | 10 | 11  | 12 | 13 | 14  | Global Quality |
|------------------------------------------|---------------|-----|-----|----|-----|-----|-----|-----|-----|-----|----|-----|----|----|-----|----------------|
| Coronado Muñoz et al. 2021 <sup>12</sup> | Cohort        | Yes | Yes | NR | Yes | NA  | Yes | Yes | NA  | Yes | No | Yes | No | NA | No  | Fair           |
| Seery et al. 2021 <sup>13</sup>          | Cohort        | Yes | Yes | NR | Yes | Yes | Yes | Yes | Yes | Yes | No | Yes | No | NA | No  | Good           |
| Torres et al. 2020 <sup>15</sup>         | Cohort        | Yes | Yes | NR | Yes | NA  | Yes | Yes | NA  | Yes | No | Yes | No | NA | No  | Fair           |
| Lima-Setta et al. 2020 <sup>19</sup>     | Cohort        | Yes | Yes | NR | Yes | NA  | Yes | Yes | NA  | Yes | No | Yes | No | NA | No  | Fair           |
| Antúnez-Montes et al. 2021 <sup>29</sup> | Cohort        | Yes | Yes | NR | Yes | NA  | Yes | Yes | NA  | Yes | No | Yes | No | NA | No  | Fair           |
| Prata-Barbosa et al. 2020 <sup>31</sup>  | Cohort        | Yes | Yes | NR | Yes | NA  | Yes | Yes | NA  | Yes | No | Yes | No | NA | Yes | Good           |
| Yock-Corrales et al. 2021 <sup>32</sup>  | Cohort        | Yes | Yes | NR | Yes | No  | Yes | Yes | NA  | Yes | No | Yes | No | NA | Yes | Good           |
| Dominguez Rojas                          | Cross section | Yes | Yes | NR | Yes | NA  | Yes | Yes | NA  | Yes | No | Yes | No | NA | No  | Fair           |

|                  |                  |         |         |    |         |    |         |         |    |         |    |    |    |    |    |      |
|------------------|------------------|---------|---------|----|---------|----|---------|---------|----|---------|----|----|----|----|----|------|
| Badue<br>Pereira | Cross<br>section | Ye<br>s | Ye<br>s | NR | Ye<br>s | NA | Ye<br>s | Ye<br>s | NA | Ye<br>s | No | No | No | NA | No | Fair |
|------------------|------------------|---------|---------|----|---------|----|---------|---------|----|---------|----|----|----|----|----|------|

Was the research question or objective in this paper clearly stated?

Was the study population clearly specified and defined

Was the participation rate of eligible persons at least 50%?

Were all the subjects selected or recruited from the same or similar populations (including the same time period)? Were inclusion and exclusion criteria for being in the study prespecified and applied uniformly to all participants?

Was a sample size justification, power description, or variance and effect estimates provided?

For the analyses in this paper, were the exposure(s) of interest measured prior to the outcome(s) being measured?

Was the timeframe sufficient so that one could reasonably expect to see an association between exposure and outcome if it existed?

For exposures that can vary in amount or level, did the study examine different levels of the exposure as related to the outcome (e.g., categories of exposure, or exposure measured as continuous variable)?

Were the exposure measures (independent variables) clearly defined, valid, reliable, and implemented consistently across all study participants?

Was the exposure(s) assessed more than once over time?

Were the outcome measures (dependent variables) clearly defined, valid, reliable, and implemented consistently across all study participants?

Were the outcome assessors blinded to the exposure status of participants?

Was loss to follow-up after baseline 20% or less?

Were key potential confounding variables measured and adjusted statistically for their impact on the relationship between exposure(s) and outcome(s)?

\*CD, cannot determine; NA, not applicable; NR, not reported

Table A3: Risk of bias of case series studies

| Study ID          | Study design | 1   | 2   | 3  | 4   | 5  | 6   | 7   | 8   | 9   | Global quality |
|-------------------|--------------|-----|-----|----|-----|----|-----|-----|-----|-----|----------------|
| Brenes Chacón     | Case series  | No  | No  | NR | NR  | NA | No  | NR  | No  | No  | Poor           |
| Gutiérrez Hidalgo | Case series  | No  | No  | NR | CD  | NA | No  | NR  | No  | No  | Poor           |
| Luna Muñoz        | Case series  | Yes | Yes | CD | Yes | NA | Yes | Yes | No  | No  | Fair           |
| De Farías         | Case series  | Yes | Yes | NR | Yes | NA | Yes | NR  | No  | Yes | Fair           |
| Coll- Vela        | Case series  | Yes | Yes | NR | Yes | NA | Yes | Yes | NR  | Yes | Fair           |
| Duarte Neto       | Case series  | No  | No  | NR | Yes | NA | Yes | NA  | No  | Yes | Poor           |
| Sandoval          | Case series  | Yes | Yes | NR | Yes | NA | Yes | CD  | No  | Yes | Fair           |
| Coila Paricahua   | Case series  | Yes | No  | NR | Yes | NA | No  | Yes | No  | No  | Poor           |
| Fontes            | Case series  | Yes | No  | NR | Yes | NA | Yes | CD  | Yes | Yes | Fair           |
| Del Aguila        | Case series  | Yes | CD  | NR | Yes | NA | No  | CD  | No  | Yes | Fair           |
| Alvarez           | Case series  | Yes | Yes | CD | Yes | NA | Yes | Yes | Yes | Yes | Good           |
| Niño Taravilla    | Case series  | Yes | Yes | CD | Yes | NA | No  | Yes | Yes | Yes | Fair           |
| Ivankovich Escoto | Case series  | Yes | No  | NR | Yes | NA | No  | No  | No  | No  | Poor           |

Was the study question or objective clearly stated?

Was the study population clearly and fully described, including a case definition?  
 Were the cases consecutive?  
 Were the subjects comparable?  
 Was the intervention clearly described?  
 Were the outcome measures clearly defined, valid, reliable, and implemented consistently across all study participants?  
 Was the length of follow-up adequate?  
 Were the statistical methods well-described?  
 Were the results well-described?  
 \*CD, cannot determine; NA, not applicable; NR, not reported

Table A4: Risk of bias case control study

| Study ID | Study design | 1   | 2   | 3  | 4   | 5   | 6   | 7  | 8   | 9  | 10  | 11 | 12  | Global quality |
|----------|--------------|-----|-----|----|-----|-----|-----|----|-----|----|-----|----|-----|----------------|
| Rosanova | Case control | Yes | Yes | No | Yes | Yes | Yes | No | Yes | No | Yes | No | Yes | Fair           |

Was the research question or objective in this paper clearly stated and appropriate?  
 Was the study population clearly specified and defined?  
 Did the authors include a sample size justification?  
 Were controls selected or recruited from the same or similar population that gave rise to the cases (including the same timeframe)?



Were the definitions, inclusion and exclusion criteria, algorithms or processes used to identify or select cases and controls valid, reliable, and implemented consistently across all study participants?

Were the cases clearly defined and differentiated from controls?

If less than 100 percent of eligible cases and/or controls were selected for the study, were the cases and/or controls randomly selected from those eligible?

Was there use of concurrent controls?

Were the investigators able to confirm that the exposure/risk occurred prior to the development of the condition or event that defined a participant as a case?

Were the measures of exposure/risk clearly defined, valid, reliable, and implemented consistently (including the same time period) across all study participants?

Were the assessors of exposure/risk blinded to the case or control status of participants?

Were key potential confounding variables measured and adjusted statistically in the analyses? If matching was used, did the investigators account for matching during study analysis?

\*CD, cannot determine; NA, not applicable; NR, not reported

Table A5: studies excluded during full-text screening phase

| <b>Author</b>                    | <b>n</b> | <b>Study design</b> | <b>Reason for exclusion</b>      |
|----------------------------------|----------|---------------------|----------------------------------|
| Caro Domínguez <sup>63</sup>     | 37       | Case series         | No specific information from LAC |
| Lindan <sup>64</sup>             | 38       | Case series         | No MIS-C in children from LAC    |
| Kehar <sup>65</sup>              | 91       | Cohort              | No specific information from LAC |
| Bautista Rodríguez <sup>66</sup> | 183      | Case series         | No specific information from LAC |

**Table A6: Detailed characteristics of SARS-CoV-2 RT-PCR, serology test results, and Kawasaki and shock presentations in MIS-C patients**

| Author                               | Number | Country                                       | PCR +       | Serology + | Close contact of COVID-19 | Kawasaki disease | Shock      |
|--------------------------------------|--------|-----------------------------------------------|-------------|------------|---------------------------|------------------|------------|
| <b>Seery et al. – 2021</b>           | 21     | Argentina                                     | 10 (47.6%)  | 19 (90.5%) | 16 (76.2%)                | NR               | 5 (23.8%)  |
| <b>Coila-Paricahua et al. – 2021</b> | 13     | Peru                                          | 0           | 13 (100%)  | NR                        | NR               | NR         |
| <b>Torres J. et al – 2020</b>        | 27     | Chile                                         | 14 (51.85%) | 10 (37%)   | 9 (33.3%)                 | 4 (14.8%)        | 16 (59%)   |
| <b>Badue Pereira et al. – 2021</b>   | 6      | Brazil                                        | 5 (83.3%)   | 1 (16.67%) | NR                        | 3 (50%)          | 5 (83.3%)  |
| <b>Rosanova et al. – 2021</b>        | 25     | Argentina                                     | 15 (60%)    | 24 (96%)   | 1 (4%)                    | NR               | 8 (32%)    |
| <b>Coll-Vela – 2021</b>              | 8      | Peru                                          | 1 (12.5%)   | 8 (100%)   | 7 (87.5%)                 | 7 (87.5%)        | 1 (12.5%)  |
| <b>Coronado Muñoz – 2021</b>         | 21     | Peru                                          | NR          | NR         | NR                        | 13 (61.9%)       | NR         |
| <b>Sandoval – 2021</b>               | 17     | Chile                                         | 8 (47%)     | 10 (58.8%) | NR                        | 13 (48%)         | 15 (88.4%) |
| <b>Yock Corrales – 2021</b>          | 69     | Argentina, Colombia, Costa Rica, Mexico, Peru | 16 (23.2%)  | 49 (71%)   | 39 (56.5%)                | NR               | NR         |
| <b>Fontes – 2021</b>                 | 42     | Brazil                                        | 5 (11.9%)   | 6 (14.3%)  | 8 (19%)                   | NR               | NR         |
| <b>Lima-Setta – 2020</b>             | 56     | Brazil                                        | 14 (25%)    | 19 (33.9%) | NR                        | 42 (75%)         | 10 (17.8%) |
| <b>Aguila – 2021</b>                 | 37     | Peru                                          | 3 (8.1%)    | 32 (86.5%) | NR                        | 18 (48.65%)      | 8 (21.6%)  |
| <b>Álvarez – 2020</b>                | 23     | Chile                                         | 11 (47.8%)  | 13 (56.5%) | 12 (52.2%)                | 18 (78.26%)      | 9 (39.13%) |
| <b>Niño-Taravilla – 2021</b>         | 26     | Chile, Colombia, Peru, Others                 | 7 (26.9%)   | 15 (57.7%) | 10 (38.4%)                | 16 (61.54%)      | 24 (92.3%) |

|                                 |    |            |            |             |            |            |            |
|---------------------------------|----|------------|------------|-------------|------------|------------|------------|
| <b>Ivankovich-Escoto – 2021</b> | 11 | Costa Rica | 5 (45.45%) | 10 (90.9%)  | 8 (72.7%)  | NR         | NR         |
| <b>Brenes-Chacón – 2021</b>     | 26 | Costa Rica | 16 (61.5%) | 18 (69.2%)  | NR         | NR         | 15 (57.7%) |
| <b>Gutiérrez-Hidalgo – 2021</b> | 4  | Costa Rica | NR         | NR          | NR         | NR         | 4 (100%)   |
| <b>Luna-Muñoz – 2021</b>        | 10 | Peru       | NR         | 10 (100%)   | 8 (80%)    | NR         | 5 (50%)    |
| <b>de Farias – 2021</b>         | 11 | Brazil     | 2 (18.2%)  | 9 (81.8%)   | 10 (91%)   | 9 (82%)    | 8 (72.7%)  |
| <b>Domínguez Rojas – 2021</b>   | 31 | Peru       | 1 (3,2%)   | 29 (93.55%) | 13 (42%)   | 12 (38.7%) | 9 (29%)    |
| <b>Duarte-Neto – 2021</b>       | 3  | Brazil     | 1 (33.3%)  | 1 (33,33%)  | 2 (66,67%) | NR         | 3 (100%)   |
| <b>Prata Barbosa – 2020</b>     | 10 | Brazil     | 5 (50%)    | 6 (60%)     | 10 (100%)  | 6 (60%)    | NR         |
| <b>Antunez-Montes – 2021</b>    | 95 | NR         | NR         | NR          | NR         | NR         | NR         |

abbreviation: NR = Not reported

Figure A1: Forest plots of laboratory test results in patients with MIS-C: (A) Platelets, (B) Lymphocytes, (C) CRP, (D) Troponin, (E) Ddimer, (F) Albumin.

(A) Platelets

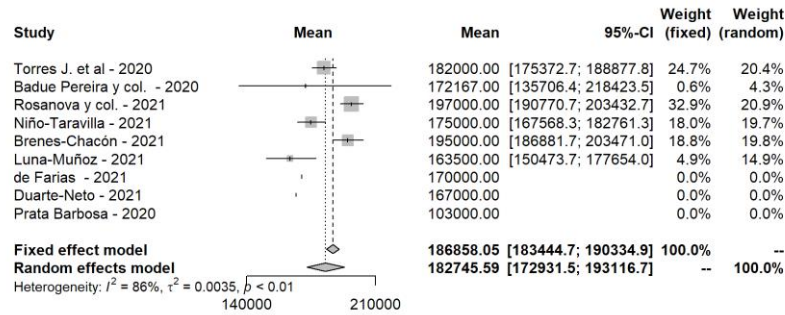

(B) Lymphocytes

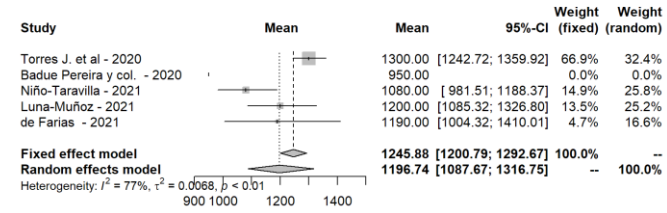

(C) CRP

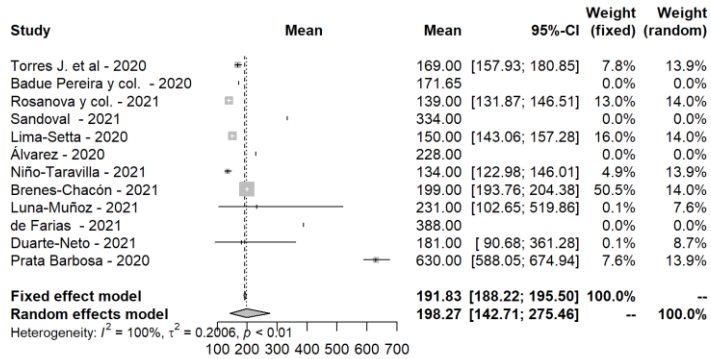

(D) Troponin

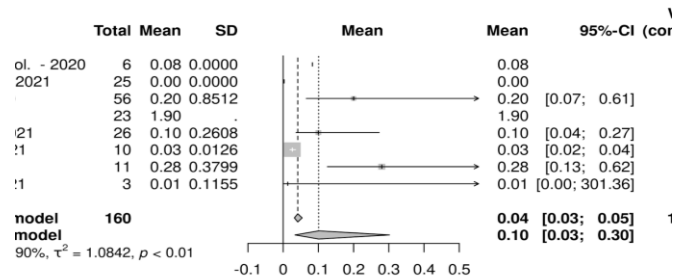

(E) D-Dimer

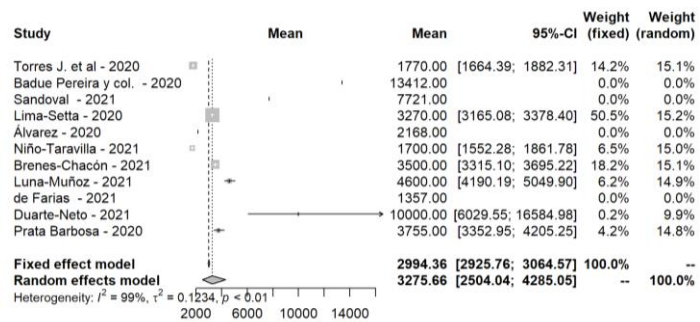

(F) Albumina

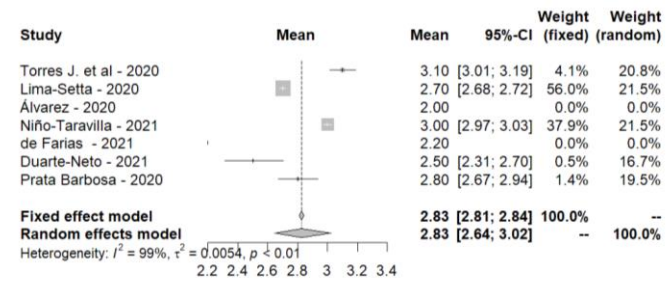

**Table A7: Cardiac involvement in patients with and without Kawasaki disease**

| Author                      | Number | Kawasaki disease | Abnormal echocardiogram | Pericarditis | Myocarditis | Ventricular dysfunction | Coronary aneurysm/dilation/abnormality | Valvular dysfunction | Abnormal ECG | Raised proBNP | Raised Troponin |
|-----------------------------|--------|------------------|-------------------------|--------------|-------------|-------------------------|----------------------------------------|----------------------|--------------|---------------|-----------------|
| Torres J. et al - 2020      | 27     | 4 (14.81%)       | 12 (44.4%)              | 12 (44.4%)   | NR          | 4 (14.81%)              | 5 (18.5%)                              | NR                   | NR           | NR            | NR              |
| Badue Pereira et al. - 2021 | 6      | 3 (50%)          | 6 (100%)                | 5 (83.33%)   | 1 (16.67%)  | 3 (50%)                 | 3 (50%)                                | NR                   | NR           | NR            | NR              |
| Coll-Vela - 2021            | 8      | 7 (87.5%)        | 2 (25%)                 | 2 (25%)      | 2 (25%)     | 2 (25%)                 | NR                                     | 1 (12,5%)            | 1 (12.5%)    | NR            | NR              |
| Coronado Muñoz - 2021       | 21     | 13 (61%)         | NR                      | 1 (5%)       | NR          | NR                      | NR                                     | NR                   | NR           | NR            | NR              |
| Sandoval - 2021             | 17     | 13 (76%)         | NR                      | NR           | NR          | NR                      | NR                                     | NR                   | NR           | NR            | NR              |
| Lima-Setta - 2020           | 56     | 42 (75%)         | 34 (61%)                | 17 (30.36%)  | NR          | 9 (16.1%)               | 9 (16%)                                | NR                   | NR           | 27 (48%)      | 24 (42%)        |
| Aguila - 2021               | 37     | 18 (48.6%)       | NR                      | NR           | NR          | NR                      | 5 (13.5%)                              | NR                   | NR           | 4 (10.8%)     | NR              |
| Álvarez - 2020              | 23     | 18 (78.2%)       | NR                      | 13 (56.5%)   | 8 (34.78%)  | NR                      | 3 (13%)                                | 2 (8.7%)             | 6 (26.1%)    | 4 (17%)       | 10 (43.5%)      |
| Niño-Taravilla - 2021       | 26     | 16 (61.4%)       | 18 (69%)                | 3 (11.54%)   | 12 (46.1%)  | 9 (34.6%)               | 5 (19.2%)                              | NR                   | NR           | NR            | NR              |
| de Farias - 2021            | 11     | 9 (82%)          | 7 (63.64%)              | 6 (54.5%)    | NR          | NR                      | 7 (64%)                                | 4 (36%)              | 5 (45.45%)   | NR            | 7 (64%)         |
| Domínguez Rojas - 2021      | 31     | 12 (38.71%)      | 8 (25.81%)              | NR           | NR          | 8 (25.81%)              | 1 (3.23%)                              | NR                   | NR           | NR            | NR              |

|                                      |    |    |         |                |            |            |            |            |    |    |    |         |            |
|--------------------------------------|----|----|---------|----------------|------------|------------|------------|------------|----|----|----|---------|------------|
| Prata<br>Barbosa -<br>2020           | 10 |    | 6 (60%) | NR             | NR         | NR         | NR         | NR         | NR | NR | NR | 6 (60%) | NR         |
| <b>Without Kawasaki</b>              |    |    |         |                |            |            |            |            |    |    |    |         |            |
| Seery et al. -<br>2021               | 21 | 0  |         | NR             | NR         | NR         | NR         | NR         | NR | NR | NR | NR      | NR         |
| Coila-<br>Paricahua et<br>al. - 2021 | 13 | NR |         | NR             | NR         | NR         | NR         | NR         | NR | NR | NR | NR      | NR         |
| Rosanova et<br>al. - 2021            | 25 | NR |         | 8 (32%)        | 1 (4%)     | 3 (12%)    | 3 (12%)    | 1 (4%)     | NR | NR | NR | NR      | NR         |
| Yock<br>Corrales -<br>2021           | 69 | NR |         | NR             | NR         | NR         | NR         | NR         | NR | NR | NR | NR      | NR         |
| Fontes - 2021                        | 42 | NR |         | NR             | NR         | NR         | NR         | NR         | NR | NR | NR | NR      | NR         |
| Ivankovich-<br>Escoto -<br>2021      | 11 | NR |         | NR             | NR         | NR         | NR         | NR         | NR | NR | NR | NR      | NR         |
| Brenes-<br>Chacón -<br>2021          | 26 | NR |         | 17<br>(65.38%) | 5 (19.23%) | 1 (3,85%)  | NR         | 4 (15.38%) | NR | NR | NR | NR      | NR         |
| Gutiérrez-<br>Hidalgo -<br>2021      | 4  | NR |         | NR             | NR         | NR         | NR         | NR         | NR | NR | NR | NR      | NR         |
| Luna-Muñoz<br>- 2021                 | 10 | NR |         | NR             | NR         | NR         | 2 (20%)    | 2 (20%)    | NR | NR | NR | 5 (50%) | 3 (30%)    |
| Duarte-Neto<br>- 2021                | 3  | NR |         | 3 (100%)       | 1 (33.33%) | 2 (66.67%) | 2 (66.67%) | 1 (33.33%) | NR | NR | NR | NR      | 1 (33.33%) |

|                       |    |    |    |           |           |    |           |    |    |    |    |
|-----------------------|----|----|----|-----------|-----------|----|-----------|----|----|----|----|
| Antunez-Montes - 2021 | 95 | NR | NR | 4 (4.21%) | 2 (2.11%) | NR | 5 (5.26%) | NR | NR | NR | NR |
|-----------------------|----|----|----|-----------|-----------|----|-----------|----|----|----|----|

abbreviation: NR = Not reported



Table A8: MIS-C Patients admitted to the PICU and use of resources

| <b>Author</b>               | <b>Number</b> | <b>PICU (LOS) days (Mean (SD))</b> | <b>Hospitalization days LOS (Mean (SD))</b> |
|-----------------------------|---------------|------------------------------------|---------------------------------------------|
| Coila-Paricahua et al.-2021 | 13            | 6 (0.7)                            | NR                                          |
| Torres J. et al - 2020      | 27            | NR                                 | 3 (5.2)                                     |
| Badue Pereira et al. - 2021 | 6             | 1                                  | NR                                          |
| Rosanova et al. - 2021      | 25            | NR                                 | 10 (2.2)                                    |
| Sandoval - 2021             | 17            | 9                                  | 13                                          |
| Fontes - 2021               | 42            | 1                                  | NR                                          |
| Lima-Setta - 2020           | 56            | 56 (4.8)                           | NR                                          |
| Álvarez - 2020              | 23            | NR                                 | 23                                          |
| Niño-Taravilla - 2021       | 26            | NR                                 | 19 (7)                                      |
| Brenes-Chacón - 2021        | 26            | NR                                 | 8.7(8.7)                                    |
| Gutiérrez-Hidalgo - 2021    | 4             | NR                                 | 11.5                                        |
| Luna-Muñoz - 2021           | 10            | NR                                 | 10.4 (3)                                    |
| de Farias - 2021            | 11            | 11 (3)                             | 17 (11.9)                                   |
| Domínguez Rojas - 2021      | 31            | NR                                 | 8                                           |
| Prata Barbosa - 2020        | 10            | 10 (3.5)                           | 0                                           |

abbreviation: NR = Not reported

**Table A9 . Treatments used in MIS-C patients in Latin America and the Caribbean**

| Authors                   | Number | Oxygen    | Intravenous immunoglobulin | Intravenous immunoglobulin (2nd dose) | Steroids  | Aspirin   | Anticoagulation | Antibiotics |
|---------------------------|--------|-----------|----------------------------|---------------------------------------|-----------|-----------|-----------------|-------------|
| Seery et al. - 2021       | 21     | 1 (4.8%)  | 20 (95.2%)                 | NR                                    | 20 (95%)  | 15 (71%)  | 14 (66.7%)      | 2 (9.5%)    |
| Torres J. et al - 2020    | 27     | 13 (48%)  | 19 (70.4%)                 | NR                                    | 17 (63%)  | 17 (63%)  | 18 (66.,7%)     | 24 (88.9%)  |
| Badue Pereira et al -2021 | 6      | 6         | 4 (66.7%)                  | NR                                    | 2 (33.3%) | 3 (50%)   | 2 (33.3%)       | 6           |
| Rosanova et al. - 2021    | 25     | NR        | 25                         | NR                                    | 15 (60%)  | NR        | NR              | NR          |
| Coll-Vela - 2021          | 8      | 1 (12%)   | 8                          | 2 (25%)                               | 8         | 8         | 6 (75%)         | 8           |
| Coronado Muñoz - 2021     | 21     | NR        | 15 (71.4%)                 | NR                                    | 8 (38.1%) | 15 (71%)  | 8 (38.1%)       | NR          |
| Sandoval - 2021           | 17     | NR        | 7 (41.2%)                  | NR                                    | 7 (41.2%) | NR        | 8 (47.1%)       | NR          |
| Yock Corrales - 2021      | 69     | 29 (42%)  | 60 (87%)                   | NR                                    | 43 (62%)  | NR        | NR              | 56 (81.2%)  |
| Lima-Setta - 2020         | 56     | 14 (25%)  | 50 (89.3%)                 | NR                                    | 31 (55%)  | 25 (44%)  | 29 (51.8%)      | 33 (58.9%)  |
| Aguila - 2021             | 37     | NR        | 36 (97.3%)                 | 10 (27%)                              | 21 (57%)  | 33 (89%)  | 4 (10.8%)       | 27 (73%)    |
| Álvarez - 2020            | 23     | NR        | 20 (87%)                   | 3 (13%)                               | 17 (74%)  | 22 (96%)  | 17 (73.9%)      | NR          |
| Niño-Taravilla - 2021     | 26     | NR        | 22 (84.6%)                 | 2 (7.7%)                              | 23 (88%)  | 19 (73%)  | 19 (73.1%)      | NR          |
| Brenes-Chacón-2021        | 26     | 8 (30.8%) | 26                         | 2 (7.7%)                              | 11 (42%)  | NR        | NR              | NR          |
| Luna-Muñoz - 2021         | 10     | 1 (10%)   | 10                         | NR                                    | 7 (70%)   | 7 (70%)   | 1 (10%)         | 8 (80%)     |
| de Farias - 2021          | 11     | NR        | 10 (90.9%)                 | NR                                    | 11        | 9 (81,8%) | 9 (81,8%)       | NR          |
| Domínguez Rojas - 2021    | 31     | 15 (48%)  | 14 (45%)                   | NR                                    | 10 (32%)  | 14 (45%)  | 2 (6.5%)        | 27 (87.1%)  |
| Duarte-Neto - 2021        | 3      | NR        | 2 (66.7%)                  | 1 (33.3%)                             | 1 (33.3%) | NR        | NR              | NR          |
| Prata Barbosa - 2020      | 10     | 4 (40%)   | NR                         | NR                                    | 2 (20%)   | NR        | NR              | 8 (80%)     |
| Antunez-Montes - 2021     | 95     | 25 (26%)  | 38 (40%)                   | NR                                    | 27 (28%)  | NR        | NR              | NR          |

abbreviation: NR = Not reported

Seven patients received Tocilizumab or Siltuximab

Table A10: Clinical and laboratory features and outcome in MIS-C patients admitted to PICU

| <b>Variables</b>                | <b>Torres et al</b>                        | <b>Coll-vela et al</b>         | <b>Badue Pereira et al</b>                 | <b>Lima-Setta</b>    | <b>de Farias</b>                       | <b>Prata Barbosa</b>                   |
|---------------------------------|--------------------------------------------|--------------------------------|--------------------------------------------|----------------------|----------------------------------------|----------------------------------------|
| Total patients                  | 27                                         | 8                              | 6                                          | 56                   | 11                                     | 10                                     |
| PICU requirement                | 16 (59.26%)                                | 1 (12.5%)                      | 6                                          | 56                   | 11                                     | 10                                     |
| Country                         | Chile                                      | Peru                           | Brazil                                     | Brazil               | Brazil                                 | Brazil                                 |
| Age: Mean (SD)                  | 6.5 (10.3)                                 | 9                              | 7.8                                        | 6.2 (5.8)            | 4.3 (8.15)                             | 5.2 (5.1)                              |
| Male                            | 9 (56.25%)                                 | 1                              | 5 (83.33%)                                 | 39 (69.64%)          | 9 (81.8%)                              | 8 (80%)                                |
| One or more comorbidities       | 4                                          | 0                              | 9                                          | 10                   | 9                                      | 2                                      |
| Fever                           | 16                                         | 1                              | 6                                          | 56                   | 11                                     | 8 (80%)                                |
| Mucocutaneous manifestations    | 23                                         | 3                              | NR                                         | 96                   | NR                                     | NR                                     |
| Respiratory manifestations      | 4                                          | 0                              | 20                                         | 49                   | 4                                      | 15                                     |
| Gastrointestinal manifestations | 28                                         | 3                              | NR                                         | 97                   | NR                                     | 15                                     |
| Hypotension                     | NR                                         | NR                             | 3 (50%)                                    | 17 (30.36%)          | NR                                     | 2 (20%)                                |
| Kawasaki Disease                | NR                                         | NR                             | 1 (16,67%)                                 | 42 (75%)             | 5 (45,45%)                             | 6 (60%)                                |
| Shock                           | NR                                         | NR                             | 5 (83.3%)                                  | 10 (17.86%)          | 8 (72.7%)                              | NR                                     |
| Lymphocytes: Mean (SD)          | 900 (800)<br>cell/mm <sup>3</sup>          | 550 cell/mm <sup>3</sup>       | 950 cell/mm <sup>3</sup>                   | NR                   | 1190 (1133)<br>cell/mm <sup>3</sup>    | NR                                     |
| Platelets: Mean (SD)            | 150000<br>(105925)<br>cell/mm <sup>3</sup> | 122000<br>cell/mm <sup>3</sup> | 172167<br>(125423)<br>cell/mm <sup>3</sup> | NR                   | 170000 (77777)<br>cell/mm <sup>3</sup> | 103000 (73148)<br>cell/mm <sup>3</sup> |
| PCR: Mean (SD)                  | 18 (12.5) mg/dl                            | 16.7 mg/dl                     | 17.1 mg/dl                                 | 15 (20.3) mg/dl      | 38.8 mg/dl                             | 63 (22) mg/dl                          |
| Ferritin: Mean (SD)             | 431 (319)<br>ng/ml                         | 495 ng/ml                      | 3660 ng/ml                                 | 464 (493)<br>ng/ml   | 619 (469)<br>ng/ml                     | 228 (906)<br>ng/ml                     |
| Procalcitonin: Mean (SD)        | NR                                         | NR                             | NR                                         | 1 (1.5) ng/ml        | NR                                     | 15.7 (11) ng/ml                        |
| Troponin: Mean (SD)             | NR                                         | NR                             | NR                                         | 0.2 (6.37)<br>ng/ml  | 0.28 (1.2)<br>ng/ml                    | 0 (0.03) ng/ml                         |
| D Dimer: Mean (SD)              | 2350 ng/ml                                 | 3680 ng/ml                     | 1341 ng/ml                                 | 3270 (3047)<br>ng/ml | 1357 ng/ml                             | 3755 (2169)<br>ng/ml                   |

|                                      |                 |          |            |                      |             |                 |
|--------------------------------------|-----------------|----------|------------|----------------------|-------------|-----------------|
| ProNRBNP: Mean (SD)                  | NR              | NR       | NR         | 5818 (8996)<br>pg/ml | NR          | 5829 pg/ml      |
| Albumin: Mean (SD)                   | 2.9 (0.44) g/dL | 2.8 g/dL | NR         | 2.7 (0.59) g/dL      | 2.2 g/dL    | 2.8 (0.59) g/dL |
| Thorax X-Ray abnormal                | NR              | 1        | 5 (83.33%) | 25 (44.64%)          | NR          | 7 (70%)         |
| Thorax CT abnormal                   | NR              | NR       | 3 (50%)    | 11 (19.64%)          | 7 (63.64%)  | 1 (10%)         |
| Oxygen                               | 12 (75%)        | NR       | NR         | 14 (25%)             | NR          | 4 (40%)         |
| Non-invasive ventilation             | NR              | 0        | NR         | 3 (5.36%)            | 4 (36.36%)  | 1 (10%)         |
| Mechanical ventilation               | 12 (75%)        | NR       | 5 (83.33%) | 6 (10.71%)           | 3 (27.27%)  | 1 (10%)         |
| Inotropes                            | 12 (75%)        | NR       | 5 (83.33%) | NR                   | 7 (63.64%)  | NR              |
| IVIG*                                | 14 (87.5%)      | NR       | 4 (66.67%) | 50 (89.29%)          | 10 (90.91%) | NR              |
| Steroids                             | 13 (81.25%)     | 0        | 2 (33.33%) | 31 (55.36%)          | 11          | 2 (20%)         |
| Aspirin                              | 13 (81.25%)     | NR       | 3 (50%)    | 25 (44.64%)          | 9 (81.82%)  | NR              |
| Anticoagulation                      | 12 (75%)        | NR       | 2 (33.33%) | 29 (51.79%)          | 9 (81.82%)  | NR              |
| Antibiotics                          | NR              | NR       | NR         | 33 (58.93%)          | NR          | 8 (80%)         |
| Antifungals                          | NR              | NR       | NR         | 4 (7.14%)            | NR          | 1 (10%)         |
| PICU LOS (Mean (SD))                 | NR              | NR       | NR         | 6 (4.81)             | 5 (2.96)    | 5.5 (3.48)      |
| Hospitalization days LOS (Mean (SD)) | 12              | 14       | NR         | NR                   | 17 (11.85)  | NR              |
| Death                                | 0               | 0        | 4 (66.67%) | 1 (1.79%)            | 2 (18.18%)  | 0               |

\* one patient (Coll-Vella) required a second dose of IVIG. abbreviation: NR = Not reported.

## Search strategies

PubMed 30/6/2021

| Search | Query                                                                                                                                                                                                                                                                                                                                                                                                                                                                                                                                                                                                                                                                                                                                                                                                                                                                                                                                                                                                                                                                                                                                                                                                                                                                                                                                                                                                                                                                                                                                                                                                                                                                                                                                                                                                                               | Results   |
|--------|-------------------------------------------------------------------------------------------------------------------------------------------------------------------------------------------------------------------------------------------------------------------------------------------------------------------------------------------------------------------------------------------------------------------------------------------------------------------------------------------------------------------------------------------------------------------------------------------------------------------------------------------------------------------------------------------------------------------------------------------------------------------------------------------------------------------------------------------------------------------------------------------------------------------------------------------------------------------------------------------------------------------------------------------------------------------------------------------------------------------------------------------------------------------------------------------------------------------------------------------------------------------------------------------------------------------------------------------------------------------------------------------------------------------------------------------------------------------------------------------------------------------------------------------------------------------------------------------------------------------------------------------------------------------------------------------------------------------------------------------------------------------------------------------------------------------------------------|-----------|
| #32    | #29 AND #30 Filters: from 2021/5/18 - 3000/12/12                                                                                                                                                                                                                                                                                                                                                                                                                                                                                                                                                                                                                                                                                                                                                                                                                                                                                                                                                                                                                                                                                                                                                                                                                                                                                                                                                                                                                                                                                                                                                                                                                                                                                                                                                                                    | 18        |
| #31    | #29 AND #30                                                                                                                                                                                                                                                                                                                                                                                                                                                                                                                                                                                                                                                                                                                                                                                                                                                                                                                                                                                                                                                                                                                                                                                                                                                                                                                                                                                                                                                                                                                                                                                                                                                                                                                                                                                                                         | 107       |
| #30    | (Americas[MeSH Terms:noexp] OR America*[tiab] OR Latin America[Mesh] OR Latin America*[tiab] OR Latinamerica*[tiab] OR Latinoamerica*[tiab] OR Latin*[tiab] OR Hispanic Americans[Mesh] OR Hispanic America*[tiab] OR Hispanoamerica*[tiab] OR Iberoamerica*[tiab] OR Ibero Americ*[tiab] OR Panamerican*[tiab] OR Central America[Mesh] OR Central America*[tiab] OR Centroamerica*[tiab] OR Mesoamerica*[tiab] OR Meso America*[tiab] OR Middle America*[tiab] OR South America[Mesh] OR South America*[tiab] OR Southamerica*[tiab] OR Sudamerica*[tiab] OR "America del sur"[tiab] OR Caribbean Region[Mesh] OR Caribbean[tiab] OR Caribe*[tiab] OR West Indies[Mesh] OR West Indi*[tiab] OR Antill*[tiab] OR Indians, South American[Mesh] OR Indians, Central American[Mesh] OR Amerindian*[tiab] OR Indians[tiab] OR American Indian*[tiab] OR Native America*[tiab] OR Patagoni*[tiab] OR Andes[tiab] OR Andean*[tiab] OR Amazon*[tiab] OR Argentin*[ad] OR Argentin*[tiab] OR Argentina[pl] OR Bolivia*[ad] OR Bolivia*[tiab] OR Bolivia[pl] OR Brazil*[ad] OR Brasil*[ad] OR Brazil*[tiab] OR Brasil*[tiab] OR Brazil[pl] OR Colombia*[ad] OR Colombia*[tiab] OR Colombia[pl] OR Chile*[ad] OR Chile*[tiab] OR Chile[pl] OR Ecuador*[ad] OR Ecuador*[ad] OR Ecuador*[tiab] OR Ecuador[pl] OR Guiana*[ad] OR Guiana*[tiab] OR French Guiana[pl] OR Guyan*[ad] OR Guyan*[tiab] OR Guyana[pl] OR Paraguay*[ad] OR Paraguay*[tiab] OR Paraguay[pl] OR Peru*[ad] OR Peru*[tiab] OR Peru[pl] OR Surinam*[ad] OR Surinam*[tiab] OR Suriname[pl] OR Uruguay*[ad] OR Uruguay*[tiab] OR Uruguay[pl] OR Venez*[ad] OR Venez*[tiab] OR Venezuela[pl] OR Belize*[ad] OR Belize*[tiab] OR Belize[pl] OR Costa Ric*[ad] OR Costarric*[ad] OR Costaric*[ad] OR Costa Ric*[tiab] OR Costarric*[tiab] OR Costaric*[tiab] OR Costa Rica[pl]) | 1,590,617 |

| Search | Query                                                                                                                                                                                                                                                                                                                                                                                                                                                                                                                                                                                                                                                          | Results |
|--------|----------------------------------------------------------------------------------------------------------------------------------------------------------------------------------------------------------------------------------------------------------------------------------------------------------------------------------------------------------------------------------------------------------------------------------------------------------------------------------------------------------------------------------------------------------------------------------------------------------------------------------------------------------------|---------|
|        | OR Salvador*[ad] OR Salvador*[tiab] OR El Salvador[pl]<br>OR Guatemal*[ad] OR Guatemal*[tiab] OR<br>Guatemala[pl] OR Hondur*[ad] OR Hondur*[tiab] OR<br>Honduras[pl] OR Nicaragu*[ad] OR Nicaragu*[tiab] OR<br>Nicaragua[pl] OR Panam*[ad] OR Panam*[tiab] OR<br>Panama[pl] OR Mexico[Mesh] OR Mexic*[ad] OR<br>Mexic*[tiab] OR Mejjc*[tiab] OR Mexico[pl] OR<br>Cuba*[ad] OR Cuba*[tiab] OR Cuba[pl] OR<br>Dominic*[ad] OR Dominic*[tiab] OR Dominican<br>Republic[pl] OR Haiti*[ad] OR Haiti*[tiab] OR Haiti[pl]<br>OR Jamaic*[ad] OR Jamaic*[tiab] OR Jamaica[pl] OR<br>Puerto Rico[Mesh] OR Puerto Ric*[tiab] OR<br>Puertorric*[tiab] OR Puertoric*[tiab]) |         |
| #29    | #1 OR #28                                                                                                                                                                                                                                                                                                                                                                                                                                                                                                                                                                                                                                                      | 942     |
| #28    | #21 AND #27                                                                                                                                                                                                                                                                                                                                                                                                                                                                                                                                                                                                                                                    | 866     |
| #27    | #22 OR #23 OR #24 OR #25 OR #26                                                                                                                                                                                                                                                                                                                                                                                                                                                                                                                                                                                                                                | 2,808   |
| #26    | PIMS[tiab]                                                                                                                                                                                                                                                                                                                                                                                                                                                                                                                                                                                                                                                     | 1,346   |
| #25    | MIS-C[tiab]                                                                                                                                                                                                                                                                                                                                                                                                                                                                                                                                                                                                                                                    | 492     |
| #24    | MISC[tiab]                                                                                                                                                                                                                                                                                                                                                                                                                                                                                                                                                                                                                                                     | 592     |
| #23    | Multi-System Inflammatory[tiab]                                                                                                                                                                                                                                                                                                                                                                                                                                                                                                                                                                                                                                | 104     |
| #22    | Multisystem Inflammatory[tiab]                                                                                                                                                                                                                                                                                                                                                                                                                                                                                                                                                                                                                                 | 1,229   |
| #21    | #2 OR #3 OR #4 OR #5 OR #6 OR #7 OR #8 OR #9 OR<br>#10 OR #11 OR #12 OR #13 OR #14 OR #15 OR #16 OR<br>#17 OR #18 OR #19 OR #20                                                                                                                                                                                                                                                                                                                                                                                                                                                                                                                                | 165,307 |
| #20    | N-Cov[tiab]                                                                                                                                                                                                                                                                                                                                                                                                                                                                                                                                                                                                                                                    | 18      |
| #19    | CV-19*[tiab]                                                                                                                                                                                                                                                                                                                                                                                                                                                                                                                                                                                                                                                   | 74      |
| #18    | CV19*[tiab]                                                                                                                                                                                                                                                                                                                                                                                                                                                                                                                                                                                                                                                    | 23      |
| #17    | HCov*[tiab]                                                                                                                                                                                                                                                                                                                                                                                                                                                                                                                                                                                                                                                    | 1,076   |
| #16    | Corono Virus[tiab]                                                                                                                                                                                                                                                                                                                                                                                                                                                                                                                                                                                                                                             | 1       |
| #15    | Virus Corona[tiab]                                                                                                                                                                                                                                                                                                                                                                                                                                                                                                                                                                                                                                             | 2,776   |

| Search | Query                                                                               | Results |
|--------|-------------------------------------------------------------------------------------|---------|
| #14    | Coronovir*[tiab]                                                                    | 57      |
| #13    | Coronavir*[tiab]                                                                    | 69,583  |
| #12    | (Pneumonia[tiab] AND Wuhan[tiab] AND 2019[tiab])                                    | 1,136   |
| #11    | SARSCoV2[tiab]                                                                      | 41,196  |
| #10    | SARS-CoV2[tiab]                                                                     | 2,077   |
| #9     | SARS-CoV-2[tiab]                                                                    | 48,009  |
| #8     | 2019-nCoV[tiab]                                                                     | 1,672   |
| #7     | COVID19*[tiab]                                                                      | 125,014 |
| #6     | COVID-19[tiab]                                                                      | 130,393 |
| #5     | Corona Virus[tiab]                                                                  | 2,107   |
| #4     | COVID-19[Mesh]                                                                      | 88,298  |
| #3     | SARS-CoV-2[Mesh]                                                                    | 68,507  |
| #2     | Coronavirus[Mesh]                                                                   | 81,022  |
| #1     | Pediatric Multisystem Inflammatory Disease, COVID-19 Related[Supplementary Concept] | 452     |

Cochrane Library 30/6/2021

| ID  | Search Hits                                          |
|-----|------------------------------------------------------|
| #1  | MeSH descriptor: [Coronavirus] explode all trees 356 |
| #2  | MeSH descriptor: [SARS-CoV-2] explode all trees 343  |
| #3  | MeSH descriptor: [COVID-19] explode all trees 466    |
| #4  | (Coron* NEAR/1 Virus):ti,ab,kw 239                   |
| #5  | COVID-19:ti,ab,kw 5915                               |
| #6  | COVID19*:ti,ab,kw 333                                |
| #7  | "2019-nCoV":ti,ab,kw 10                              |
| #8  | SARS-CoV-2:ti,ab,kw 255                              |
| #9  | SARS-CoV2:ti,ab,kw 60                                |
| #10 | SARSCoV2:ti,ab,kw 209                                |
| #11 | (Pneumonia AND Wuhan AND 2019):ti,ab,kw 94           |

#12 Coronavir\*:ti,ab,kw 3624  
 #13 Coronovir\*:ti,ab,kw 1  
 #14 HCov\*:ti,ab,kw 17  
 #15 CV19\*:ti,ab,kw 0  
 #16 CV-19\*:ti,ab,kw 12  
 #17 N-Cov:ti,ab,kw 22  
 #18 #1 OR #2 OR #3 OR #4 OR #5 OR #6 OR #7 OR #8 OR #9 OR #10 OR #11 OR  
 #12 OR #13 OR #14 OR #15 OR #16 OR #17 6352  
 #19 (Multisystem NEAR/2 Inflammatory):ti,ab,kw 29  
 #20 (Multi-System NEAR/2 Inflammatory):ti,ab,kw 13  
 #21 MISC:ti,ab,kw 59  
 #22 MIS-C:ti,ab,kw 3  
 #23 PIMS:ti,ab,kw 114  
 #24 #19 OR #20 OR #21 OR #22 OR #23 200  
 #25 #18 AND #24 5  
 #26 MeSH descriptor: [Americas] this term only 18  
 #27 MeSH descriptor: [Latin America] explode all trees 119  
 #28 (Latin NEAR/1 America\*):ti,ab,kw 1332  
 #29 Latinamerica\*:ti,ab,kw 70  
 #30 Latinoamerica\*:ti,ab,kw 38  
 #31 Hispanoamerica\*:ti,ab,kw 1  
 #32 Iberoamerica\*:ti,ab,kw 14  
 #33 (Ibero NEAR/1 Americ\*):ti,ab,kw 4  
 #34 Panamerican\*:ti,ab,kw 10  
 #35 MeSH descriptor: [Central America] explode all trees 278  
 #36 Centroamerica\*:ti,ab,kw 1  
 #37 Mesoamerica\*:ti,ab,kw 5  
 #38 (Meso NEAR/1 America\*):ti,ab,kw 0  
 #39 (Middle NEAR/1 America\*):ti,ab,kw 29  
 #40 MeSH descriptor: [South America] explode all trees 2551  
 #41 (South NEAR/1 America\*):ti,ab,kw 765  
 #42 Southamerica\*:ti,ab,kw 8  
 #43 Sudamerica\*:ti,ab,kw 5  
 #44 (America NEAR/2 Sur):ti,ab,kw 40  
 #45 MeSH descriptor: [Caribbean Region] explode all trees 403  
 #46 Caribbean:ti,ab,kw 559  
 #47 Caribe\*:ti,ab,kw 30  
 #48 MeSH descriptor: [West Indies] explode all trees 385  
 #49 (West NEAR/1 Indi\*):ti,ab,kw 75  
 #50 Antill\*:ti,ab,kw 15  
 #51 MeSH descriptor: [Indians, South American] explode all trees 12



|     |                                                              |      |
|-----|--------------------------------------------------------------|------|
| #52 | MeSH descriptor: [Indians, South American] explode all trees | 12   |
| #53 | Amerindian*:ti,ab,kw                                         | 16   |
| #54 | Indians:ti,ab,kw                                             | 634  |
| #55 | (American NEAR/1 Indian*):ti,ab,kw                           | 584  |
| #56 | (Native NEAR/1 America*):ti,ab,kw                            | 301  |
| #57 | Patagoni*:ti,ab,kw                                           | 1    |
| #58 | Andes:ti,ab,kw                                               | 2940 |
| #59 | Andean*:ti,ab,kw                                             | 51   |
| #60 | Amazon*:ti,ab,kw                                             | 379  |
| #61 | Argentin*:ti,ab,kw                                           | 962  |
| #62 | Bolivia*:ti,ab,kw                                            | 129  |
| #63 | Brazil*:ti,ab,kw                                             | 6146 |
| #64 | Brasil*:ti,ab,kw                                             | 549  |
| #65 | Colombia*:ti,ab,kw                                           | 1002 |
| #66 | Chile*:ti,ab,kw                                              | 869  |
| #67 | Ecuador*:ti,ab,kw                                            | 232  |
| #68 | Guiana*:ti,ab,kw                                             | 7    |
| #69 | Guyan*:ti,ab,kw                                              | 30   |
| #70 | Paraguay*:ti,ab,kw                                           | 41   |
| #71 | Peru*:ti,ab,kw                                               | 2052 |
| #72 | Surinam*:ti,ab,kw                                            | 48   |
| #73 | Uruguay*:ti,ab,kw                                            | 101  |
| #74 | Venez*:ti,ab,kw                                              | 210  |
| #75 | Belize*:ti,ab,kw                                             | 18   |
| #76 | (Costa NEAR/1 Ric*):ti,ab,kw                                 | 127  |
| #77 | Costaric*:ti,ab,kw                                           | 0    |
| #78 | Costarric*:ti,ab,kw                                          | 2    |
| #79 | Salvador*:ti,ab,kw                                           | 171  |
| #80 | Guatemal*:ti,ab,kw                                           | 355  |
| #81 | Hondur*:ti,ab,kw                                             | 104  |
| #82 | Nicaragu*:ti,ab,kw                                           | 87   |
| #83 | Panam*:ti,ab,kw                                              | 158  |
| #84 | MeSH descriptor: [Mexico] explode all trees                  | 641  |
| #85 | Mexic*:ti,ab,kw                                              | 3115 |
| #86 | Cuba*:ti,ab,kw                                               | 490  |
| #87 | Dominic*:ti,ab,kw                                            | 146  |
| #88 | Haiti*:ti,ab,kw                                              | 234  |
| #89 | MeSH descriptor: [Puerto Rico] explode all trees             | 114  |
| #90 | (Puerto NEAR/1 Ric*):ti,ab,kw                                | 467  |
| #91 | Puertoric*:ti,ab,kw                                          | 0    |
| #92 | Puertoric*:ti,ab,kw                                          | 6    |

#93 #26 OR #27 OR #28 OR #29 OR #30 OR #31 OR #32 OR #33 OR #34 OR #35 OR  
 #36 OR #37 OR #38 OR #39 OR #40 OR #41 OR #42 OR #43 OR #44 OR #45 OR #46  
 OR #47 OR #48 OR #49 OR #50 OR #51 OR #52 OR #53 OR #54 OR #55 OR #56 OR  
 #57 OR #58 OR #59 OR #60 OR #61 OR #62 OR #63 OR #64 OR #65 OR #66 OR #67  
 OR #68 OR #69 OR #70 OR #71 OR #72 OR #73 OR #74 OR #75 OR #76 OR #77 OR  
 #78 OR #79 OR #80 OR #81 OR #82 OR #83 OR #84 OR #85 OR #86 OR #87 OR #88  
 OR #89 OR #90 OR #91 OR #92 21315  
 #94 #25 AND #93 0

CINAHL (EBSCO) 1/7/2021

| #   | Query                                                                                                                                                                                                                                                                                                                                                                                                                                                                                                                                                                                                                                                                                                                                                                                                                                                                                                                                                                                                                                                         | Results |
|-----|---------------------------------------------------------------------------------------------------------------------------------------------------------------------------------------------------------------------------------------------------------------------------------------------------------------------------------------------------------------------------------------------------------------------------------------------------------------------------------------------------------------------------------------------------------------------------------------------------------------------------------------------------------------------------------------------------------------------------------------------------------------------------------------------------------------------------------------------------------------------------------------------------------------------------------------------------------------------------------------------------------------------------------------------------------------|---------|
| S30 | S26 AND S29 Limiters - Published Date:<br>20210501-20210731                                                                                                                                                                                                                                                                                                                                                                                                                                                                                                                                                                                                                                                                                                                                                                                                                                                                                                                                                                                                   | 5       |
| S29 | S27 OR S28                                                                                                                                                                                                                                                                                                                                                                                                                                                                                                                                                                                                                                                                                                                                                                                                                                                                                                                                                                                                                                                    | 142,531 |
| S28 | AB (Latin N1 America*) OR<br>Latinamerica* OR Latinoamerica* OR<br>Latin* OR Hispanic Americans OR<br>Iberoamerica* OR (Ibero N1 Americ*)<br>OR Panamerican* OR (Central N1<br>America*) OR Centroamerica* OR<br>Mesoamerica* OR (Meso N1 America*)<br>OR (Middle N1 America*) OR (South<br>N1 America*) OR Southamerica* OR<br>Sudamerica* OR (America N1 Sur) OR<br>Caribbean OR Caribe* OR (West N1<br>Indi*) OR Antill* OR Amerindian* OR<br>Indians OR (American N1 Indian*) OR<br>(Native N1 America*) OR Patagoni* OR<br>Andes OR Andean* OR Amazon* OR<br>Argentin* OR Bolivia* OR Brazil* OR<br>Brasil* Colombia* OR Colombia* OR<br>Colombia OR Chile* OR Ecuador* OR<br>Guiana* OR Guyan* OR Guyan* OR<br>Paraguay* OR Paraguay* OR Peru* OR<br>Surinam* OR Surinam* OR Uruguay*<br>OR Venez* OR Belize* OR (Costa N1<br>Ric*) OR Costarric* OR Costaric* OR<br>Costa Ric* OR Costarric* OR Salvador*<br>OR Salvador* OR Guatemal* OR<br>Guatemal* OR Guatemala OR Hondur*<br>OR Nicaragu* OR Panam* OR Mexic*<br>OR Cuba* OR Dominic* OR Dominic* | 142,531 |

|     |                                                                                                                                                                                                                                                                                                                                                                                                                                                                                                                                                                                                                                                                                                                                                                                                                                                                                                                                                                                                                                                   |         |
|-----|---------------------------------------------------------------------------------------------------------------------------------------------------------------------------------------------------------------------------------------------------------------------------------------------------------------------------------------------------------------------------------------------------------------------------------------------------------------------------------------------------------------------------------------------------------------------------------------------------------------------------------------------------------------------------------------------------------------------------------------------------------------------------------------------------------------------------------------------------------------------------------------------------------------------------------------------------------------------------------------------------------------------------------------------------|---------|
|     | OR Haiti* OR Jamaic* OR (Puerto N1 Ric*) OR Puertoric* OR Puertoric*                                                                                                                                                                                                                                                                                                                                                                                                                                                                                                                                                                                                                                                                                                                                                                                                                                                                                                                                                                              |         |
|     | TI (Latin N1 America*) OR Latinamerica* OR Latinoamerica* OR Latin* OR Hispanic Americans OR Iberoamerica* OR (Ibero N1 Americ*) OR Panamerican* OR (Central N1 America*) OR Centroamerica* OR Mesoamerica* OR (Meso N1 America*) OR (Middle N1 America*) OR (South N1 America*) OR Southamerica* OR Sudamerica* OR (America N1 Sur) OR Caribbean OR Caribe* OR (West N1 Indi*) OR Antill* OR Amerindian* OR Indians OR (American N1 Indian*) OR (Native N1 America*) OR Patagoni* OR Andes OR Andean* OR Amazon* OR Argentin* OR Bolivia* OR Brazil* OR Brasil* Colombia* OR Colombia* OR Colombia OR Chile* OR Ecuador* OR Guiana* OR Guyan* OR Guyan* OR Paraguay* OR Paraguay* OR Peru* OR Surinam* OR Surinam* OR Uruguay* OR Venez* OR Belize* OR (Costa N1 Ric*) OR Costarric* OR Costaric* OR Costa Ric* OR Costarric* OR Salvador* OR Salvador* OR Guatemal* OR Guatemal* OR Guatemala OR Hondur* OR Nicaragu* OR Panam* OR Mexic* OR Cuba* OR Dominic* OR Dominic* OR Haiti* OR Jamaic* OR (Puerto N1 Ric*) OR Puertoric* OR Puertoric* | 142,531 |
| S27 |                                                                                                                                                                                                                                                                                                                                                                                                                                                                                                                                                                                                                                                                                                                                                                                                                                                                                                                                                                                                                                                   |         |
| S26 | S19 AND S25                                                                                                                                                                                                                                                                                                                                                                                                                                                                                                                                                                                                                                                                                                                                                                                                                                                                                                                                                                                                                                       | 202     |
| S25 | S20 OR S21 OR S22 OR S23 OR S24                                                                                                                                                                                                                                                                                                                                                                                                                                                                                                                                                                                                                                                                                                                                                                                                                                                                                                                                                                                                                   | 1,098   |
| S24 | TI PIMS OR AB PIMS                                                                                                                                                                                                                                                                                                                                                                                                                                                                                                                                                                                                                                                                                                                                                                                                                                                                                                                                                                                                                                | 694     |
| S23 | TI MISC OR AB MISC                                                                                                                                                                                                                                                                                                                                                                                                                                                                                                                                                                                                                                                                                                                                                                                                                                                                                                                                                                                                                                | 45      |
| S22 | TI MIS-C OR AB MIS-C                                                                                                                                                                                                                                                                                                                                                                                                                                                                                                                                                                                                                                                                                                                                                                                                                                                                                                                                                                                                                              | 131     |
|     | TI (Multi-System N2 Inflammatory) OR AB (Multi-System N2 Inflammatory)                                                                                                                                                                                                                                                                                                                                                                                                                                                                                                                                                                                                                                                                                                                                                                                                                                                                                                                                                                            | 28      |
| S21 |                                                                                                                                                                                                                                                                                                                                                                                                                                                                                                                                                                                                                                                                                                                                                                                                                                                                                                                                                                                                                                                   |         |
|     | TI (Multisystem N2 Inflammatory) OR AB (Multisystem N2 Inflammatory)                                                                                                                                                                                                                                                                                                                                                                                                                                                                                                                                                                                                                                                                                                                                                                                                                                                                                                                                                                              | 341     |
| S20 |                                                                                                                                                                                                                                                                                                                                                                                                                                                                                                                                                                                                                                                                                                                                                                                                                                                                                                                                                                                                                                                   |         |

|     |                                                                                                                            |        |
|-----|----------------------------------------------------------------------------------------------------------------------------|--------|
| S19 | S1 OR S2 OR S3 OR S4 OR S5 OR S6<br>OR S7 OR S8 OR S9 OR S10 OR S11<br>OR S12 OR S13 OR S14 OR S15 OR<br>S16 OR S17 OR S18 | 36,041 |
| S18 | TI N-Cov* OR AB N-Cov*                                                                                                     | 4      |
| S17 | TI CV-19* OR AB CV-19*                                                                                                     | 53     |
| S16 | TI CV-19* OR AB CV-19*                                                                                                     | 53     |
| S15 | TI CV19* OR AB CV19*                                                                                                       | 1      |
| S14 | TI HCov* OR AB HCov*                                                                                                       | 85     |
| S13 | TI Coronovir* OR AB Coronovir*                                                                                             | 8      |
| S12 | TI Coronavir* OR AB Coronavir*                                                                                             | 14,038 |
| S11 | TI (Pneumonia AND Wuhan AND 2019)<br>OR AB (Pneumonia AND Wuhan AND<br>2019)                                               | 217    |
| S10 | TI SARSCoV2 OR AB SARSCoV2                                                                                                 | 9      |
| S9  | TI SARS-CoV2 OR AB SARS-CoV2                                                                                               | 195    |
| S8  | TI SARS-CoV-2 OR AB SARS-CoV-2                                                                                             | 5,857  |
| S7  | TI 2019-nCoV OR AB 2019-nCoV                                                                                               | 210    |
| S6  | TI COVID19* OR AB COVID19*                                                                                                 | 220    |
| S5  | TI COVID-19 OR AB COVID-19                                                                                                 | 30,675 |
| S4  | TI (Coron* N1 Virus) OR AB (Coron*<br>N1 Virus)                                                                            | 417    |
| S3  | MH "COVID-19"                                                                                                              | 10,977 |
| S2  | (MH "Coronavirus Infections+")                                                                                             | 17,989 |
| S1  | (MH "Coronavirus+")                                                                                                        | 1,211  |

☰ YOUR SELECTION
>> SEND RESULT
🔍 NEW SEARCH
⚙️ CONFIG
⏴ PAGE BOTTOM

Database : **LILACS**  
 Search on : **(MH Coronavirus OR MH SARS-CoV-2 OR MH COVID-19 OR Corona OR COVID-19 OR COVID19\$ OR 2019-nCoV OR SARS-CoV-2 OR SARS-CoV2 OR SARSCoV2 OR Coronavir\$ OR Coronovir\$ OR Coronovir\$ OR HCov\$ OR CV19\$ OR CV-19\$ OR N-Cov) AND (Multisystem\$ OR Multi-System\$ OR Multisistémico OR Multissistêmico OR MISC OR MIS-C OR PIMS OR SIMS OR SIMP OR SIM-P) [Words] and 2021 [Country, year publication]**  
 References found : **15** [[refine](#)]  
 Displaying: **1 .. 10** in format [**Detailed**]

2/7/2021 Global Health <1910 to 2021 Week 26>

- 1 exp Coronaviridae/ 10441
- 2 (Coron\* adj1 Virus).ti,ab. 778
- 3 COVID-19.ti,ab. 31746
- 4 COVID19\*.ti,ab. 353
- 5 2019-nCoV.ti,ab. 1106
- 6 SARS-CoV-2.ti,ab. 13901
- 7 SARS-CoV2.ti,ab. 514
- 8 SARSCoV2.ti,ab. 13
- 9 (Pneumonia and Wuhan and "2019").ti,ab. 454
- 10 Coronavir\*.ti,ab. 21299
- 11 Coronovir\*.ti,ab. 12
- 12 HCov\*.ti,ab. 556
- 13 CV19\*.ti,ab. 8
- 14 CV-19\*.ti,ab. 16
- 15 N-Cov.ti,ab. 8
- 16 or/1-1541856
- 17 (Multisystem adj2 Inflammatory).ti,ab. 238
- 18 (Multi-System adj2 Inflammatory).ti,ab. 16
- 19 MISC.ti,ab. 87
- 20 MIS-C.ti,ab. 116

21 PIMS.ti,ab. 148  
 22 or/17-21 479  
 23 16 and 22 224  
 24 (Latin America\* or Latinamerica\* or Latinoamerica\* or Latin\* or Hispanic  
 Americans or Iberoamerica\* or Ibero Americ\* or Panamerican\* or Central America\* or  
 Centroamerica\* or Mesoamerica\* or Meso America\* or Middle America\* or South  
 America\* or Southamerica\* or Sudamerica\* or America del sur or Caribbean or Caribe\* or  
 West Indi\* or Antill\* or Amerindian\* or Indians or American Indian\* or Native America\*  
 or Patagoni\* or Andes or Andean\* or Amazon\* or Argentin\* or Bolivia\* or Brazil\* or  
 Brasil\* Colombia\* or Colombia\* or Colombia or Chile\* or Ecuador\* or Guiana\* or  
 Guyan\* or Guyan\* or Paraguay\* or Paraguay\* or Peru\* or Surinam\* or Surinam\* or  
 Uruguay\* or Venez\* or Belize\* or Costa Ric\* or Costarric\* or Costaric\* or Costa Ric\* or  
 Costarric\* or Salvador\* or Salvador\* or Salvador or Guatemal\* or Guatemal\* or  
 Guatemala or Hondur\* or Nicaragu\* Panam\* or Mexic\* or Cuba\* or Dominic\* or  
 Dominic\* or Haiti\* or Jamaic\* or Puerto Ric\* or Puertorric\* or Puertoric\*).ti,ab. 228194  
 25 23 and 24 11  
 26 limit 25 to yr="2021 -Current" 4

EMBase (Elsevier) 4/7/2021

.....

| No.  | Query Results                                                                                                                                                                                                                                                                                                                                                                                                                                                                                                                                                                                                                                                                                                                                                                                                          | Results | Date |
|------|------------------------------------------------------------------------------------------------------------------------------------------------------------------------------------------------------------------------------------------------------------------------------------------------------------------------------------------------------------------------------------------------------------------------------------------------------------------------------------------------------------------------------------------------------------------------------------------------------------------------------------------------------------------------------------------------------------------------------------------------------------------------------------------------------------------------|---------|------|
| #29. | #28 AND 2021:py                                                                                                                                                                                                                                                                                                                                                                                                                                                                                                                                                                                                                                                                                                                                                                                                        | 11      |      |
| #28. | #26 AND #27                                                                                                                                                                                                                                                                                                                                                                                                                                                                                                                                                                                                                                                                                                                                                                                                            | 21      |      |
| #27. | americas:ti,ab OR 'south and central america'/exp<br>OR ((latin NEAR/1 america*):ti,ab) OR<br>latinamerica*:ti,ab OR latinoamerica*:ti,ab OR<br>hispanoamerica:ti,ab OR iberoamerica*:ti,ab OR<br>((ibero NEAR/1 americ*):ti,ab) OR<br>panamerica*:ti,ab OR ((south NEAR/1<br>america*):ti,ab) OR southamerica*:ti,ab OR<br>sudamerica*:ti,ab OR (america:ti,ab AND del:ti,ab<br>AND sur:ti,ab) OR ((central NEAR/1<br>america*):ti,ab) OR centroamerica*:ti,ab OR<br>mesoamerica*:ti,ab OR ((meso NEAR/1<br>america*):ti,ab) OR ((middle NEAR/1<br>america*):ti,ab) OR 'caribbean'/exp OR 'caribbean<br>islands'/exp OR caribbean*:ti,ab OR caribe*:ti,ab<br>OR ((west NEAR/1 indi*):ti,ab) OR antill*:ti,ab<br>OR 'american indian'/exp OR amerindian*:ti,ab OR<br>indians:ti,ab OR ((native NEAR/1 america*):ti,ab) | 555,976 |      |

OR patagoni\*:ti,ab OR andes:ti,ab OR  
 andean\*:ti,ab OR amazon\*:ti,ab OR 'argentina'/exp  
 OR argentin\*:ti,ab OR 'bolivia'/exp OR  
 bolivia\*:ti,ab OR 'brazil'/exp OR brazil\*:ti,ab  
 OR brasil\*:ti,ab OR 'colombia'/exp OR  
 colombia\*:ti,ab OR 'chile'/exp OR chile\*:ti,ab OR  
 'ecuador'/exp OR ecuador\*:ti,ab OR 'french  
 guiana'/exp OR guiana\*:ti,ab OR 'guyana'/exp OR  
 guyan\*:ti,ab OR 'paraguay'/exp OR paraguay\*:ti,ab  
 OR 'peru'/exp OR peru\*:ti,ab OR 'suriname'/exp OR  
 surinam\*:ti,ab OR 'uruguay'/exp OR uruguay\*:ti,ab  
 OR 'venezuela'/exp OR venez\*:ti,ab OR  
 'belize'/exp OR beliz\*:ti,ab OR 'costa rica'/exp  
 OR 'costa rica':ti,ab OR costarric\*:ti,ab OR  
 costaric\*:ti,ab OR 'el salvador'/exp OR  
 salvador\*:ti,ab OR 'guatemala'/exp OR  
 guatemal\*:ti,ab OR 'honduras'/exp OR  
 hondur\*:ti,ab OR 'nicaragua'/exp OR  
 nicaragu\*:ti,ab OR 'panama'/exp OR panam\*:ti,ab  
 OR 'mexico'/exp OR mexic\*:ti,ab OR mejic\*:ti,ab  
 OR 'cuba'/exp OR cuba\*:ti,ab OR 'dominican  
 republic'/exp OR dominica\*:ti,ab OR 'haiti'/exp  
 OR haiti\*:ti,ab OR 'jamaica'/exp OR jamaic\*:ti,ab  
 OR 'puerto rico'/exp OR ((puerto NEAR/1  
 ric\*):ti,ab) OR puertoric\*:ti,ab OR  
 puertorric\*:ti,ab  
 #26. #19 AND #25 594  
 #25. #21 OR #22 OR #23 OR #24 2,934  
 #24. pims:ti,ab 1,990  
 #23. 'mis c':ti,ab 491  
 #22. misc:ti,ab 319  
 #21. ('multi system' NEAR/2 inflammatory):ti,ab 203  
 #20. (multisystem NEAR/2 inflammatory):ti,ab 1,871  
 #19. #1 OR #2 OR #3 OR #4 OR #5 OR #6 OR #7 OR #8 OR 178,865  
 #9 OR #10 OR #11 OR #12 OR #13 OR #14 OR #15 OR  
 #16 OR #17 OR #18  
 #18. 'n cov':ti,ab 29  
 #17. 'cv 19\*':ti,ab 128  
 #16. cv19\*:ti,ab 24  
 #15. hcov\*:ti,ab 1,096  
 #14. coronovir\*:ti,ab 61

|                                                              |         |        |
|--------------------------------------------------------------|---------|--------|
| #13. coronavir*:ti,ab                                        | 63,544  |        |
| #12. pneumonia:ti,ab AND wuhan:ti,ab AND 2019:ti,ab          |         | 1,161  |
| #11. 'sarscov2':ti,ab                                        | 97      |        |
| #10. 'sars cov2':ti,ab                                       | 2,034   |        |
| #9. 'sars cov 2':ti,ab                                       | 40,987  |        |
| #8. '2019 ncov':ti,ab                                        | 1,307   |        |
| #7. covid19*:ti,ab                                           | 1,938   |        |
| #6. 'covid 19':ti,ab                                         | 127,107 |        |
| #5. (coron* NEAR/1 virus):ti,ab                              | 2,350   |        |
| #4. 'coronavirus disease 2019'/exp                           | 127,157 |        |
| #3. 'severe acute respiratory syndrome coronavirus<br>2'/exp |         | 35,276 |
| #2. 'coronavirinae'/exp                                      | 62,765  |        |
| #1. 'pediatric multisystem inflammatory syndrome'/exp        |         | 567    |
